# Supplementary material for: Crosstalk of cuproptosis-related prognostic signature and competing endogenous RNAs regulation in hepatocellular carcinoma
Source: publisher site journal article supplement (doi:10.18632/aging.205273), 2023-12-10
Supplement: Supplementary file [file aging-v15i23-205273-supplementary-material-SD2.pdf]

**SUPPLEMENTARY TABLES**

**Supplementary Table 1. The mRNA-miRNA pairs predicted by mirTarBase and TarBase V.8 database.**

| <b>mRNA</b> | <b>miRNA</b>    |
|-------------|-----------------|
| GLS         | hsa-miR-125b-5p |
| CDKN2A      | hsa-miR-125b-5p |
| CDKN2A      | hsa-miR-10b-5p  |
| PDHA1       | hsa-miR-10b-5p  |
| DLAT        | hsa-miR-10b-5p  |
| CDKN2A      | hsa-miR-24-3p   |
| GLS         | hsa-miR-24-3p   |
| PDHA1       | hsa-miR-24-3p   |
| GLS         | hsa-let-7b-5p   |
| DLAT        | hsa-let-7b-5p   |
| CDKN2A      | hsa-let-7b-5p   |
| GLS         | hsa-miR-34a-5p  |
| CDKN2A      | hsa-miR-34a-5p  |
| GLS         | hsa-miR-335-5p  |
| GLS         | hsa-miR-320a    |
| CDKN2A      | hsa-miR-320a    |
| DLAT        | hsa-miR-615-3p  |
| CDKN2A      | hsa-miR-615-3p  |
| DLAT        | hsa-miR-338-5p  |
| PDHA1       | hsa-miR-192-5p  |
| DLAT        | hsa-miR-192-5p  |
| CDKN2A      | hsa-miR-192-5p  |
| PDHA1       | hsa-miR-548k    |
| GLS         | hsa-miR-7-5p    |
| GLS         | hsa-miR-590-5p  |
| GLS         | hsa-let-7g-5p   |
| DLAT        | hsa-let-7g-5p   |
| CDKN2A      | hsa-let-7g-5p   |
| PDHA1       | hsa-miR-877-3p  |
| GLS         | hsa-miR-124-3p  |
| CDKN2A      | hsa-miR-124-3p  |
| DLAT        | hsa-miR-124-3p  |
| GLS         | hsa-miR-155-5p  |
| CDKN2A      | hsa-miR-155-5p  |
| DLAT        | hsa-miR-155-5p  |
| GLS         | hsa-miR-16-5p   |
| CDKN2A      | hsa-miR-16-5p   |
| DLAT        | hsa-miR-16-5p   |
| CDKN2A      | hsa-miR-191-5p  |
| PDHA1       | hsa-miR-191-5p  |

**Supplementary Table 2. The miRNA-lncRNA pairs predicted by miRNet database.**

| <b>miRNA</b>    | <b>lncRNA</b>          |
|-----------------|------------------------|
| hsa-mir-125b-5p | LINC01128              |
| hsa-mir-125b-5p | LINC01654              |
| hsa-mir-125b-5p | MIR29B2CHG             |
| hsa-mir-125b-5p | LGALS8-AS1             |
| hsa-mir-125b-5p | CYP1B1-AS1             |
| hsa-mir-125b-5p | PCBP1-AS1              |
| hsa-mir-125b-5p | CYTOR                  |
| hsa-mir-125b-5p | TBC1D8-AS1             |
| hsa-mir-125b-5p | MIR4435-2HG            |
| hsa-mir-125b-5p | PAX8-AS1               |
| hsa-mir-125b-5p | KLF7-IT1               |
| hsa-mir-125b-5p | ACVR2B-AS1             |
| hsa-mir-125b-5p | DUBR                   |
| hsa-mir-125b-5p | GATA2-AS1              |
| hsa-mir-125b-5p | TNK2-AS1               |
| hsa-mir-125b-5p | NOP14-AS1              |
| hsa-mir-125b-5p | TAPT1-AS1              |
| hsa-mir-125b-5p | DANCR                  |
| hsa-mir-125b-5p | STAG3L5P-PVRIG2P-PILRB |
| hsa-mir-125b-5p | LNCPRESS1              |
| hsa-mir-125b-5p | RNF139-AS1             |
| hsa-mir-125b-5p | GLIDR                  |
| hsa-mir-125b-5p | FAM27C                 |
| hsa-mir-125b-5p | ZSWIM8-AS1             |
| hsa-mir-125b-5p | RPARP-AS1              |
| hsa-mir-125b-5p | LINC01164              |
| hsa-mir-125b-5p | KCNQ1OT1               |
| hsa-mir-125b-5p | BDNF-AS                |
| hsa-mir-125b-5p | MIR194-2HG             |
| hsa-mir-125b-5p | NEAT1                  |
| hsa-mir-125b-5p | LINC00943              |
| hsa-mir-125b-5p | N4BP2L2-IT2            |
| hsa-mir-125b-5p | ZFHX2-AS1              |
| hsa-mir-125b-5p | ST20-AS1               |
| hsa-mir-125b-5p | LINC00273              |
| hsa-mir-125b-5p | MAPT-IT1               |
| hsa-mir-125b-5p | LINC00667              |
| hsa-mir-125b-5p | PCAT18                 |
| hsa-mir-125b-5p | PARD6G-AS1             |
| hsa-mir-125b-5p | LINC00661              |
| hsa-mir-125b-5p | LINC00261              |
| hsa-mir-125b-5p | PLAC4                  |
| hsa-mir-125b-5p | PICSAR                 |
| hsa-mir-125b-5p | GUSBP11                |
| hsa-mir-125b-5p | INE1                   |
| hsa-mir-125b-5p | LINC01278              |
| hsa-mir-125b-5p | XIST                   |
